# Supplementary material
Source: MDPI journal article supplement (https://www.mdpi.com/2073-445X/11/5/717)
Supplement: s1 [file s1]

## Online Supplemental

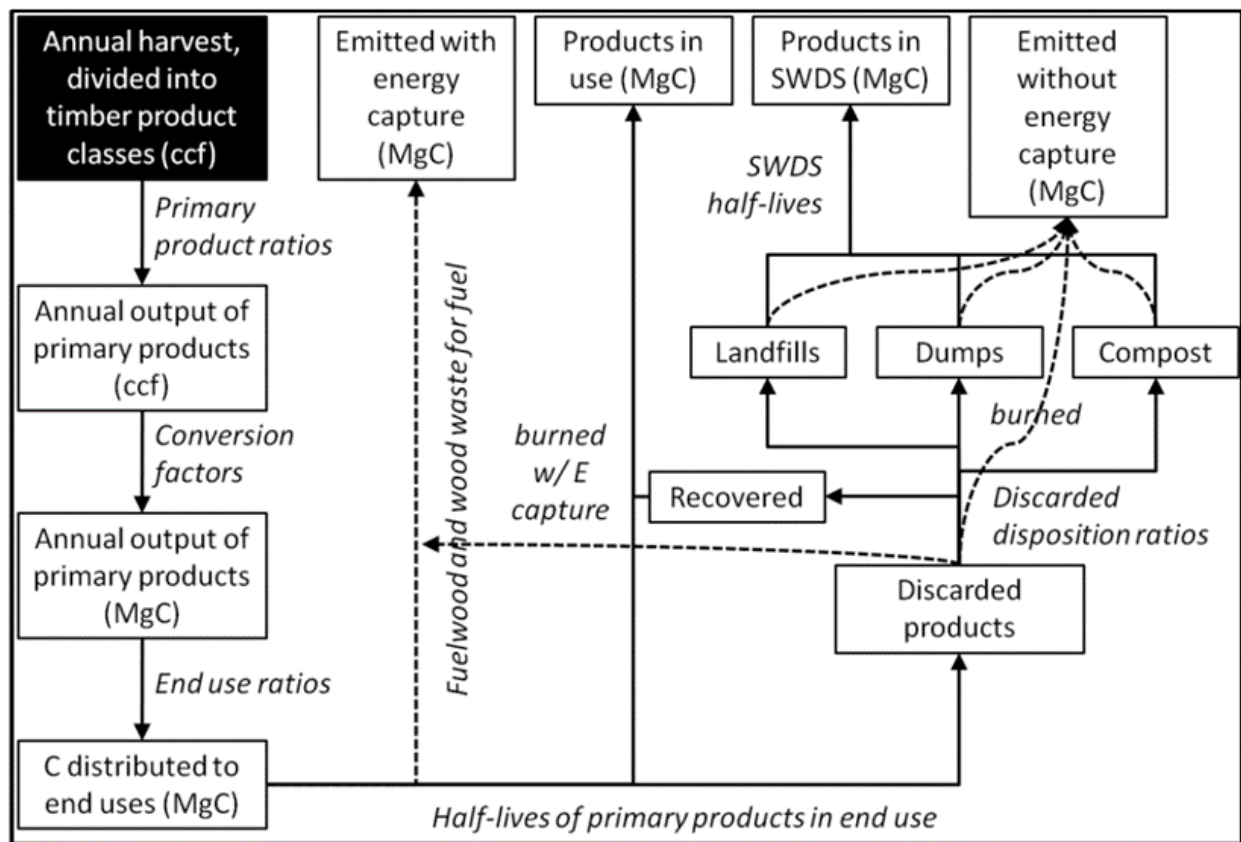

**Figure S1.** Approach to quantifying harvested wood product pools (HWP) storage and emissions (from [1]).

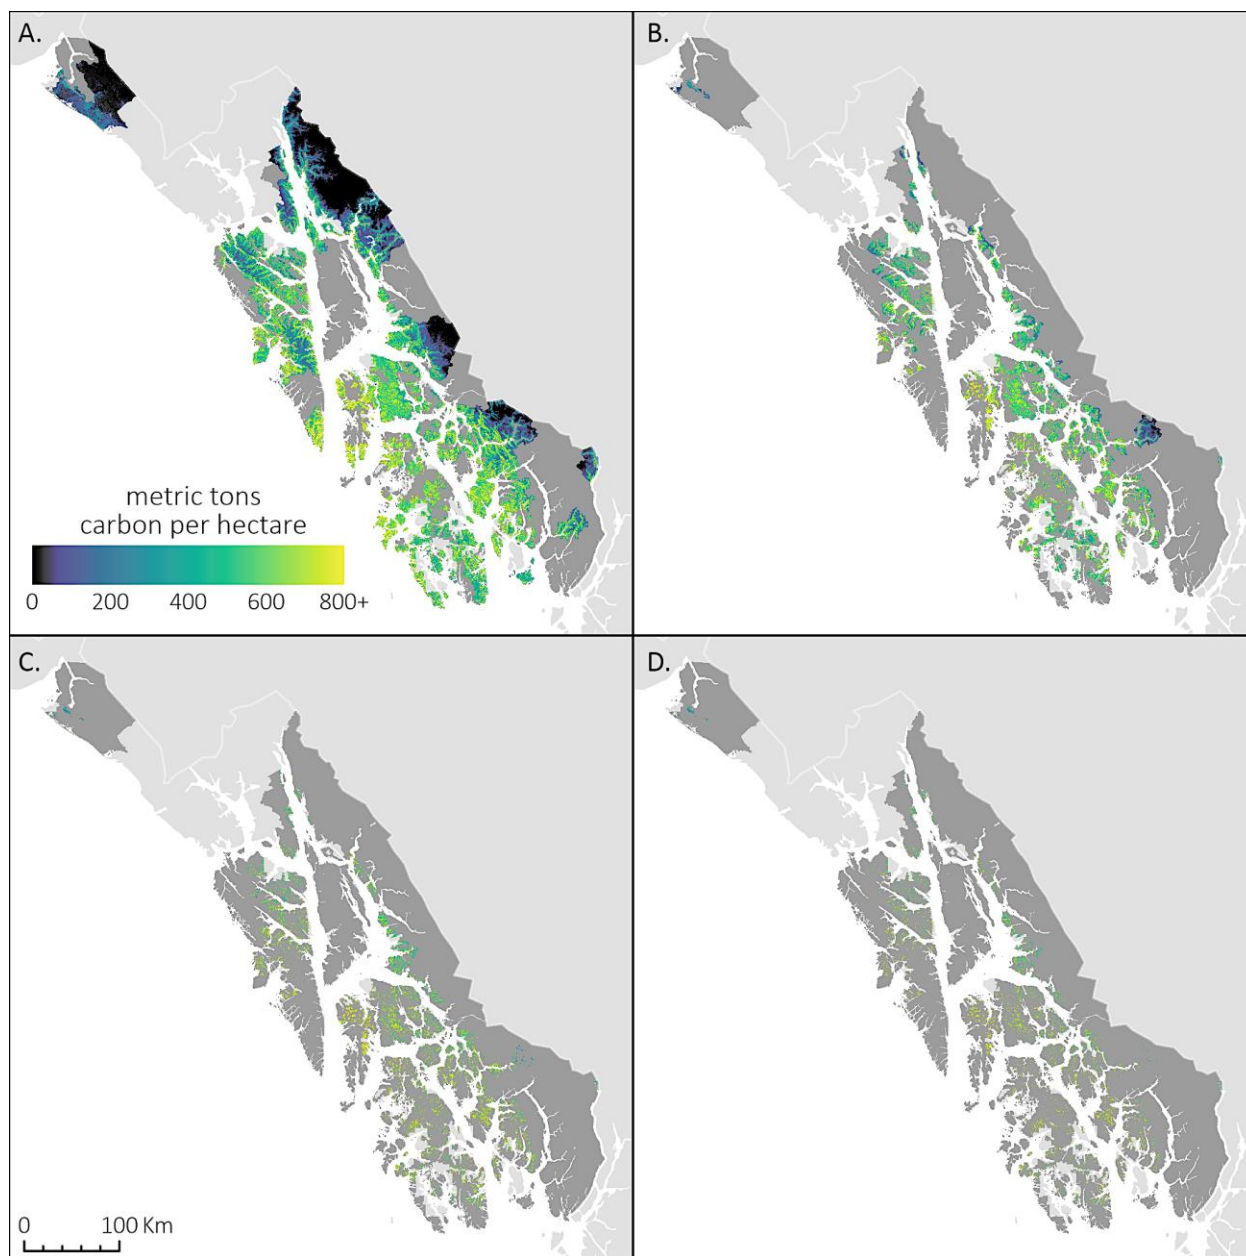

**Figure S2.** Spatial distribution of total carbon (metric tons  $\text{ha}^{-1}$ ) in woody plant biomass and soil in at-risk scenarios for IRAs (inventoried roadless areas): (A) all IRAs, (B) Scenario 1, (C) Scenario 2, and (D) Scenario 3. Study area shown in gray.

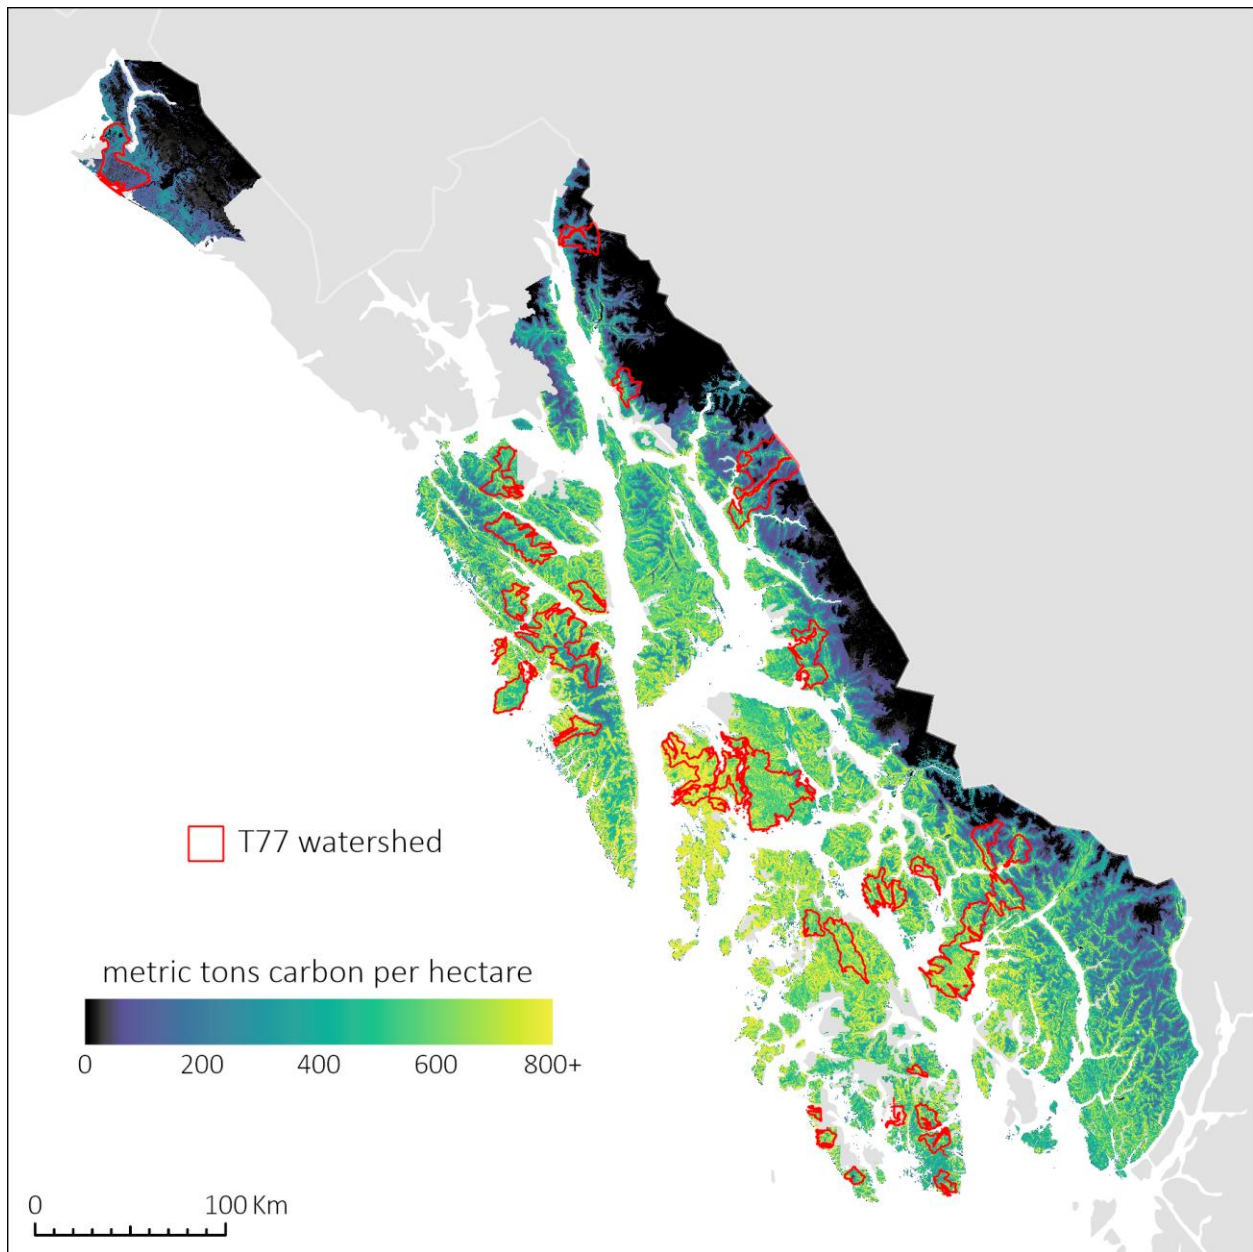

**Figure S3.** Spatial distribution of T77 watersheds and total carbon (metric tons  $\text{ha}^{-1}$ ) in woody plant biomass and soil pools combined.

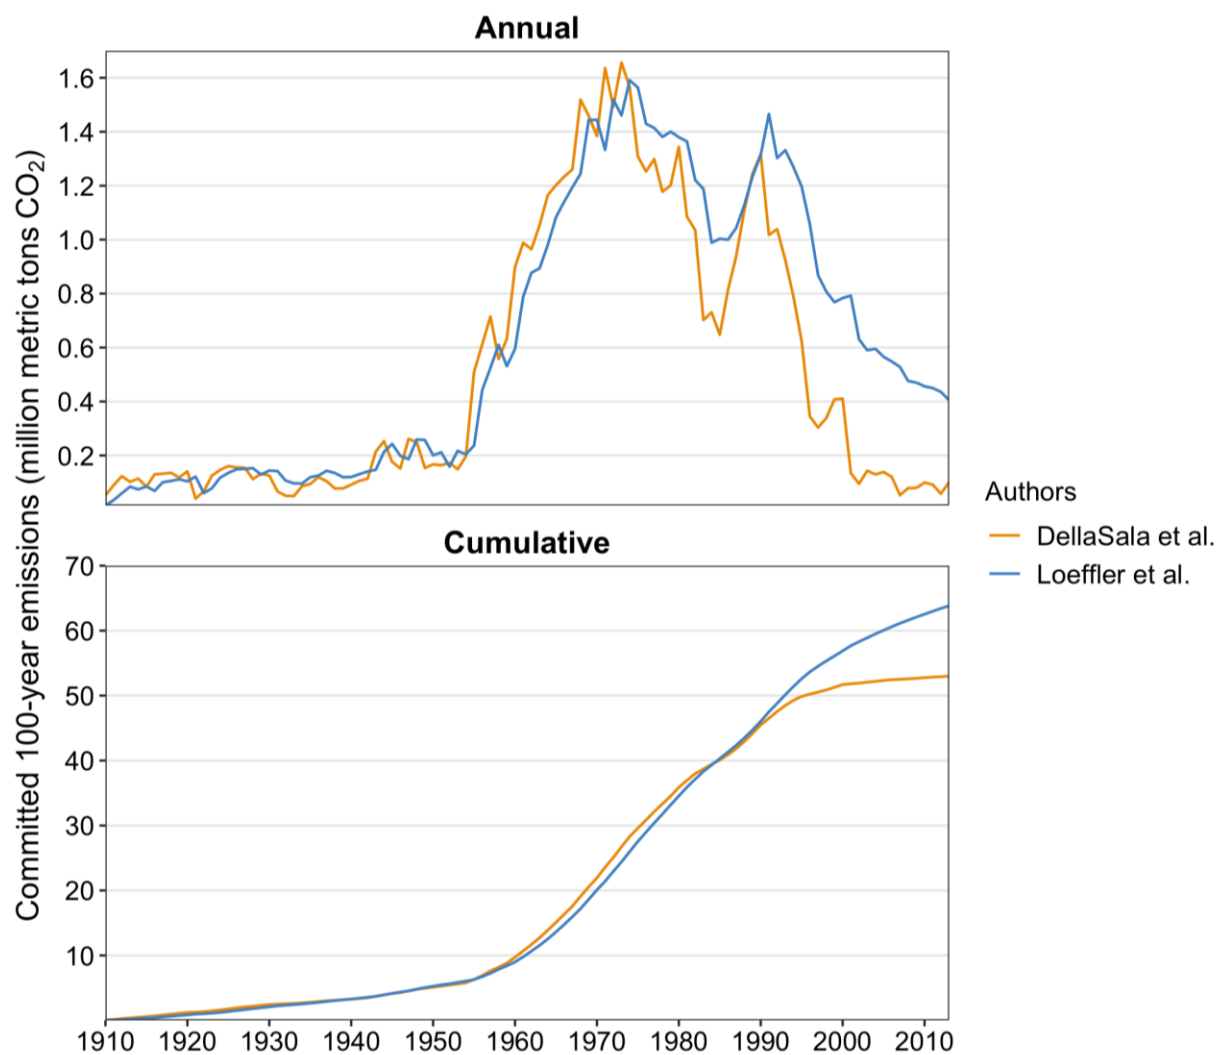

**Figure S4.** Committed 100-year emissions from both the Tongass and Chugach National Forest timber harvests (1910-2013). Comparison of our study with prior research [2]. Graphical results are based on data from both the Tongass and Chugach for consistency with prior research [2].

**Table S1.** Carbon datasets used in this study.

| <b>Carbon Pool</b> | <b>Description</b>                                                                                                                                                                     | <b>Spatial Resolution</b> | <b>Citation</b> |
|--------------------|----------------------------------------------------------------------------------------------------------------------------------------------------------------------------------------|---------------------------|-----------------|
| Biomass            | Potential C density estimates in woody biomass pools including live trees, roots, woody debris, seedlings/saplings, snags, and understory vegetation. Includes lower and upper bounds. | 30 m                      | [3]             |
| Biomass            | C density estimates in aboveground live dry woody biomass.                                                                                                                             | 30 m                      | [4]             |
| Soil               | Soil organic C density estimates in top 1 m of mineral soil plus surface organic horizons.                                                                                             | 90.5 m                    | [5]             |

**Table S2.** Historic (1909-2021) and projected (2022-2100) harvest levels (thousand cubic meters per year,  $1 \times 10^3 \text{ m}^3 \text{ yr}^{-1}$ ), committed 100-year emissions (thousand metric tons carbon dioxide equivalents per year,  $1 \times 10^3 \text{ tCO}_2 \text{ yr}^{-1}$ ), annual realized emissions ( $1 \times 10^3 \text{ tCO}_2 \text{ yr}^{-1}$ ), and cumulative realized emissions ( $1 \times 10^3 \text{ tCO}_2 \text{ yr}^{-1}$ ) on the Tongass National Forest. All emissions estimates are based on a 100-year HWP disposition period.

| <b>Inventory Year</b>   | <b>Harvest<br/>(<math>1 \times 10^3 \text{ m}^3 \text{ yr}^{-1}</math>)</b> | <b>Committed<br/>100-year<br/>Emissions<br/>(<math>1 \times 10^3 \text{ tCO}_2 \text{ yr}^{-1}</math>)</b> | <b>Annual<br/>Realized<br/>Emissions<br/>(<math>1 \times 10^3 \text{ tCO}_2 \text{ yr}^{-1}</math>)</b> | <b>Cumulative<br/>Realized<br/>Emissions<br/>(<math>1 \times 10^3 \text{ tCO}_2 \text{ yr}^{-1}</math>)</b> |
|-------------------------|-----------------------------------------------------------------------------|------------------------------------------------------------------------------------------------------------|---------------------------------------------------------------------------------------------------------|-------------------------------------------------------------------------------------------------------------|
| <i>Early Historical</i> |                                                                             |                                                                                                            |                                                                                                         |                                                                                                             |
| 1909                    | 37                                                                          | 17                                                                                                         | 9                                                                                                       | 9                                                                                                           |
| 1910                    | 75                                                                          | 35                                                                                                         | 18                                                                                                      | 27                                                                                                          |
| 1911                    | 183                                                                         | 84                                                                                                         | 44                                                                                                      | 71                                                                                                          |
| 1912                    | 257                                                                         | 118                                                                                                        | 63                                                                                                      | 133                                                                                                         |
| 1913                    | 200                                                                         | 92                                                                                                         | 52                                                                                                      | 185                                                                                                         |
| 1914                    | 241                                                                         | 111                                                                                                        | 63                                                                                                      | 249                                                                                                         |
| 1915                    | 174                                                                         | 80                                                                                                         | 50                                                                                                      | 298                                                                                                         |
| 1916                    | 257                                                                         | 118                                                                                                        | 70                                                                                                      | 369                                                                                                         |
| 1917                    | 249                                                                         | 114                                                                                                        | 70                                                                                                      | 439                                                                                                         |
| 1918                    | 262                                                                         | 120                                                                                                        | 75                                                                                                      | 514                                                                                                         |
| 1919                    | 227                                                                         | 104                                                                                                        | 69                                                                                                      | 583                                                                                                         |
| 1920                    | 277                                                                         | 127                                                                                                        | 82                                                                                                      | 665                                                                                                         |
| 1921                    | 71                                                                          | 33                                                                                                         | 36                                                                                                      | 700                                                                                                         |
| 1922                    | 125                                                                         | 58                                                                                                         | 48                                                                                                      | 748                                                                                                         |
| 1923                    | 246                                                                         | 113                                                                                                        | 76                                                                                                      | 825                                                                                                         |
| 1924                    | 295                                                                         | 136                                                                                                        | 89                                                                                                      | 914                                                                                                         |
| 1925                    | 326                                                                         | 150                                                                                                        | 98                                                                                                      | 1,012                                                                                                       |
| 1926                    | 310                                                                         | 142                                                                                                        | 97                                                                                                      | 1,109                                                                                                       |
| 1927                    | 316                                                                         | 145                                                                                                        | 100                                                                                                     | 1,208                                                                                                       |
| 1928                    | 205                                                                         | 94                                                                                                         | 76                                                                                                      | 1,284                                                                                                       |
| 1929                    | 255                                                                         | 117                                                                                                        | 88                                                                                                      | 1,372                                                                                                       |
| 1930                    | 234                                                                         | 107                                                                                                        | 84                                                                                                      | 1,456                                                                                                       |
| 1931                    | 111                                                                         | 51                                                                                                         | 56                                                                                                      | 1,512                                                                                                       |
| 1932                    | 89                                                                          | 41                                                                                                         | 50                                                                                                      | 1,562                                                                                                       |
| 1933                    | 89                                                                          | 41                                                                                                         | 50                                                                                                      | 1,612                                                                                                       |
| 1934                    | 171                                                                         | 79                                                                                                         | 68                                                                                                      | 1,680                                                                                                       |
| 1935                    | 185                                                                         | 85                                                                                                         | 72                                                                                                      | 1,752                                                                                                       |
| 1936                    | 243                                                                         | 112                                                                                                        | 86                                                                                                      | 1,838                                                                                                       |
| 1937                    | 214                                                                         | 99                                                                                                         | 80                                                                                                      | 1,918                                                                                                       |
| 1938                    | 155                                                                         | 71                                                                                                         | 67                                                                                                      | 1,985                                                                                                       |
| 1939                    | 161                                                                         | 74                                                                                                         | 68                                                                                                      | 2,054                                                                                                       |

| <b>Inventory Year</b> | <b>Harvest<br/>(1x10<sup>3</sup> m<sup>3</sup> yr<sup>-1</sup>)</b> | <b>Committed<br/>100-year<br/>Emissions<br/>(1x10<sup>3</sup> tCO<sub>2</sub> yr<sup>-1</sup>)</b> | <b>Annual<br/>Realized<br/>Emissions<br/>(1x10<sup>3</sup> tCO<sub>2</sub> yr<sup>-1</sup>)</b> | <b>Cumulative<br/>Realized<br/>Emissions<br/>(1x10<sup>3</sup> tCO<sub>2</sub> yr<sup>-1</sup>)</b> |
|-----------------------|---------------------------------------------------------------------|----------------------------------------------------------------------------------------------------|-------------------------------------------------------------------------------------------------|-----------------------------------------------------------------------------------------------------|
| 1940                  | 187                                                                 | 86                                                                                                 | 75                                                                                              | 2,128                                                                                               |
| 1941                  | 217                                                                 | 100                                                                                                | 82                                                                                              | 2,210                                                                                               |
| 1942                  | 234                                                                 | 108                                                                                                | 87                                                                                              | 2,297                                                                                               |
| 1943                  | 447                                                                 | 205                                                                                                | 137                                                                                             | 2,434                                                                                               |
| 1944                  | 527                                                                 | 242                                                                                                | 159                                                                                             | 2,593                                                                                               |
| 1945                  | 354                                                                 | 163                                                                                                | 122                                                                                             | 2,715                                                                                               |
| 1946                  | 295                                                                 | 136                                                                                                | 110                                                                                             | 2,825                                                                                               |
| 1947                  | 506                                                                 | 233                                                                                                | 160                                                                                             | 2,985                                                                                               |
| 1948                  | 492                                                                 | 226                                                                                                | 160                                                                                             | 3,145                                                                                               |
| 1949                  | 299                                                                 | 137                                                                                                | 117                                                                                             | 3,262                                                                                               |
| 1950                  | 331                                                                 | 152                                                                                                | 125                                                                                             | 3,388                                                                                               |
| 1951                  | 321                                                                 | 148                                                                                                | 124                                                                                             | 3,512                                                                                               |
| <i><b>Pulp</b></i>    |                                                                     |                                                                                                    |                                                                                                 |                                                                                                     |
| 1952                  | 352                                                                 | 162                                                                                                | 132                                                                                             | 3,644                                                                                               |
| 1953                  | 301                                                                 | 138                                                                                                | 121                                                                                             | 3,765                                                                                               |
| 1954                  | 406                                                                 | 186                                                                                                | 146                                                                                             | 3,912                                                                                               |
| 1955                  | 1,089                                                               | 500                                                                                                | 307                                                                                             | 4,219                                                                                               |
| 1956                  | 1,310                                                               | 602                                                                                                | 368                                                                                             | 4,587                                                                                               |
| 1957                  | 1,540                                                               | 708                                                                                                | 431                                                                                             | 5,018                                                                                               |
| 1958                  | 1,189                                                               | 546                                                                                                | 361                                                                                             | 5,379                                                                                               |
| 1959                  | 1,325                                                               | 609                                                                                                | 401                                                                                             | 5,780                                                                                               |
| 1960                  | 1,912                                                               | 879                                                                                                | 546                                                                                             | 6,326                                                                                               |
| 1961                  | 2,110                                                               | 970                                                                                                | 607                                                                                             | 6,932                                                                                               |
| 1962                  | 2,060                                                               | 947                                                                                                | 610                                                                                             | 7,542                                                                                               |
| 1963                  | 2,253                                                               | 1,036                                                                                              | 669                                                                                             | 8,212                                                                                               |
| 1964                  | 2,524                                                               | 1,160                                                                                              | 747                                                                                             | 8,959                                                                                               |
| 1965                  | 2,578                                                               | 1,185                                                                                              | 777                                                                                             | 9,735                                                                                               |
| 1966                  | 2,669                                                               | 1,227                                                                                              | 815                                                                                             | 10,550                                                                                              |
| 1967                  | 2,735                                                               | 1,257                                                                                              | 847                                                                                             | 11,397                                                                                              |
| 1968                  | 3,287                                                               | 1,511                                                                                              | 992                                                                                             | 12,389                                                                                              |
| 1969                  | 3,149                                                               | 1,447                                                                                              | 981                                                                                             | 13,370                                                                                              |
| 1970                  | 2,993                                                               | 1,376                                                                                              | 963                                                                                             | 14,332                                                                                              |
| 1971                  | 3,547                                                               | 1,630                                                                                              | 1,108                                                                                           | 15,440                                                                                              |
| 1972                  | 3,233                                                               | 1,486                                                                                              | 1,055                                                                                           | 16,495                                                                                              |
| 1973                  | 3,586                                                               | 1,648                                                                                              | 1,154                                                                                           | 17,649                                                                                              |
| 1974                  | 3,398                                                               | 1,562                                                                                              | 1,130                                                                                           | 18,779                                                                                              |
| 1975                  | 2,807                                                               | 1,290                                                                                              | 1,008                                                                                           | 19,787                                                                                              |
| 1976                  | 2,698                                                               | 1,240                                                                                              | 991                                                                                             | 20,778                                                                                              |
| 1977                  | 2,771                                                               | 1,273                                                                                              | 1,017                                                                                           | 21,795                                                                                              |
| 1978                  | 2,514                                                               | 1,155                                                                                              | 965                                                                                             | 22,760                                                                                              |
| 1979                  | 2,563                                                               | 1,178                                                                                              | 983                                                                                             | 23,742                                                                                              |
| 1980                  | 2,915                                                               | 1,340                                                                                              | 1,071                                                                                           | 24,813                                                                                              |

| <b>Inventory Year</b>    | <b>Harvest<br/>(1x10<sup>3</sup> m<sup>3</sup> yr<sup>-1</sup>)</b> | <b>Committed<br/>100-year<br/>Emissions<br/>(1x10<sup>3</sup> tCO<sub>2</sub> yr<sup>-1</sup>)</b> | <b>Annual<br/>Realized<br/>Emissions<br/>(1x10<sup>3</sup> tCO<sub>2</sub> yr<sup>-1</sup>)</b> | <b>Cumulative<br/>Realized<br/>Emissions<br/>(1x10<sup>3</sup> tCO<sub>2</sub> yr<sup>-1</sup>)</b> |
|--------------------------|---------------------------------------------------------------------|----------------------------------------------------------------------------------------------------|-------------------------------------------------------------------------------------------------|-----------------------------------------------------------------------------------------------------|
| 1981                     | 2,347                                                               | 1,079                                                                                              | 947                                                                                             | 25,760                                                                                              |
| 1982                     | 2,250                                                               | 1,034                                                                                              | 928                                                                                             | 26,689                                                                                              |
| 1983                     | 1,521                                                               | 699                                                                                                | 761                                                                                             | 27,449                                                                                              |
| 1984                     | 1,586                                                               | 729                                                                                                | 770                                                                                             | 28,219                                                                                              |
| 1985                     | 1,405                                                               | 646                                                                                                | 724                                                                                             | 28,943                                                                                              |
| 1986                     | 1,765                                                               | 811                                                                                                | 803                                                                                             | 29,746                                                                                              |
| 1987                     | 2,038                                                               | 937                                                                                                | 866                                                                                             | 30,613                                                                                              |
| 1988                     | 2,406                                                               | 1,106                                                                                              | 954                                                                                             | 31,567                                                                                              |
| 1989                     | 2,700                                                               | 1,241                                                                                              | 1,028                                                                                           | 32,595                                                                                              |
| 1990                     | 2,858                                                               | 1,314                                                                                              | 1,074                                                                                           | 33,669                                                                                              |
| 1991                     | 2,208                                                               | 1,015                                                                                              | 932                                                                                             | 34,601                                                                                              |
| 1992                     | 2,245                                                               | 1,032                                                                                              | 942                                                                                             | 35,543                                                                                              |
| 1993                     | 1,975                                                               | 908                                                                                                | 883                                                                                             | 36,426                                                                                              |
| 1994                     | 1,675                                                               | 770                                                                                                | 813                                                                                             | 37,239                                                                                              |
| 1995                     | 1,343                                                               | 617                                                                                                | 732                                                                                             | 37,971                                                                                              |
| 1996                     | 730                                                                 | 335                                                                                                | 584                                                                                             | 38,555                                                                                              |
| 1997                     | 648                                                                 | 298                                                                                                | 552                                                                                             | 39,107                                                                                              |
| 1998                     | 727                                                                 | 334                                                                                                | 560                                                                                             | 39,667                                                                                              |
| 1999                     | 885                                                                 | 407                                                                                                | 587                                                                                             | 40,254                                                                                              |
| 2000                     | 892                                                                 | 410                                                                                                | 581                                                                                             | 40,835                                                                                              |
| <b><i>Post Pulp</i></b>  |                                                                     |                                                                                                    |                                                                                                 |                                                                                                     |
| 2001                     | 290                                                                 | 133                                                                                                | 433                                                                                             | 41,267                                                                                              |
| 2002                     | 205                                                                 | 94                                                                                                 | 400                                                                                             | 41,667                                                                                              |
| 2003                     | 312                                                                 | 143                                                                                                | 412                                                                                             | 42,079                                                                                              |
| 2004                     | 282                                                                 | 130                                                                                                | 395                                                                                             | 42,474                                                                                              |
| 2005                     | 301                                                                 | 138                                                                                                | 388                                                                                             | 42,862                                                                                              |
| 2006                     | 262                                                                 | 120                                                                                                | 370                                                                                             | 43,232                                                                                              |
| 2007                     | 114                                                                 | 52                                                                                                 | 326                                                                                             | 43,558                                                                                              |
| 2008                     | 170                                                                 | 78                                                                                                 | 328                                                                                             | 43,886                                                                                              |
| 2009                     | 172                                                                 | 79                                                                                                 | 319                                                                                             | 44,205                                                                                              |
| 2010                     | 215                                                                 | 99                                                                                                 | 321                                                                                             | 44,526                                                                                              |
| 2011                     | 198                                                                 | 91                                                                                                 | 309                                                                                             | 44,835                                                                                              |
| 2012                     | 126                                                                 | 58                                                                                                 | 285                                                                                             | 45,121                                                                                              |
| 2013                     | 221                                                                 | 101                                                                                                | 299                                                                                             | 45,419                                                                                              |
| 2014                     | 238                                                                 | 109                                                                                                | 296                                                                                             | 45,715                                                                                              |
| 2015                     | 345                                                                 | 159                                                                                                | 315                                                                                             | 46,030                                                                                              |
| <b><i>Transition</i></b> |                                                                     |                                                                                                    |                                                                                                 |                                                                                                     |
| 2016                     | 276                                                                 | 127                                                                                                | 294                                                                                             | 46,325                                                                                              |
| 2017                     | 122                                                                 | 56                                                                                                 | 253                                                                                             | 46,577                                                                                              |
| 2018                     | 120                                                                 | 55                                                                                                 | 246                                                                                             | 46,823                                                                                              |
| 2019                     | 71                                                                  | 33                                                                                                 | 227                                                                                             | 47,050                                                                                              |
| 2020                     | 92                                                                  | 42                                                                                                 | 226                                                                                             | 47,276                                                                                              |

| <b>Inventory Year</b> | <b>Harvest<br/>(1x10<sup>3</sup> m<sup>3</sup> yr<sup>-1</sup>)</b> | <b>Committed<br/>100-year<br/>Emissions<br/>(1x10<sup>3</sup> tCO<sub>2</sub> yr<sup>-1</sup>)</b> | <b>Annual<br/>Realized<br/>Emissions<br/>(1x10<sup>3</sup> tCO<sub>2</sub> yr<sup>-1</sup>)</b> | <b>Cumulative<br/>Realized<br/>Emissions<br/>(1x10<sup>3</sup> tCO<sub>2</sub> yr<sup>-1</sup>)</b> |
|-----------------------|---------------------------------------------------------------------|----------------------------------------------------------------------------------------------------|-------------------------------------------------------------------------------------------------|-----------------------------------------------------------------------------------------------------|
| 2021                  | 108                                                                 | 50                                                                                                 | 224                                                                                             | 47,500                                                                                              |
| <i>Projections</i>    |                                                                     |                                                                                                    |                                                                                                 |                                                                                                     |
| 2022                  | 279                                                                 | 128                                                                                                | 258                                                                                             | 47,757                                                                                              |
| 2023                  | 279                                                                 | 128                                                                                                | 254                                                                                             | 48,012                                                                                              |
| 2024                  | 279                                                                 | 128                                                                                                | 250                                                                                             | 48,262                                                                                              |
| 2025                  | 279                                                                 | 128                                                                                                | 247                                                                                             | 48,509                                                                                              |
| 2026                  | 279                                                                 | 128                                                                                                | 244                                                                                             | 48,753                                                                                              |
| 2027                  | 279                                                                 | 128                                                                                                | 240                                                                                             | 48,993                                                                                              |
| 2028                  | 279                                                                 | 128                                                                                                | 236                                                                                             | 49,230                                                                                              |
| 2029                  | 279                                                                 | 128                                                                                                | 234                                                                                             | 49,464                                                                                              |
| 2030                  | 279                                                                 | 128                                                                                                | 231                                                                                             | 49,695                                                                                              |
| 2031                  | 279                                                                 | 128                                                                                                | 228                                                                                             | 49,924                                                                                              |
| 2032                  | 595                                                                 | 273                                                                                                | 299                                                                                             | 50,223                                                                                              |
| 2033                  | 595                                                                 | 273                                                                                                | 301                                                                                             | 50,524                                                                                              |
| 2034                  | 595                                                                 | 273                                                                                                | 301                                                                                             | 50,824                                                                                              |
| 2035                  | 595                                                                 | 273                                                                                                | 300                                                                                             | 51,124                                                                                              |
| 2036                  | 595                                                                 | 273                                                                                                | 301                                                                                             | 51,425                                                                                              |
| 2037                  | 595                                                                 | 273                                                                                                | 301                                                                                             | 51,725                                                                                              |
| 2038                  | 595                                                                 | 273                                                                                                | 300                                                                                             | 52,026                                                                                              |
| 2039                  | 595                                                                 | 273                                                                                                | 300                                                                                             | 52,326                                                                                              |
| 2040                  | 595                                                                 | 273                                                                                                | 300                                                                                             | 52,626                                                                                              |
| 2041                  | 595                                                                 | 273                                                                                                | 300                                                                                             | 52,926                                                                                              |
| 2042                  | 595                                                                 | 273                                                                                                | 300                                                                                             | 53,226                                                                                              |
| 2043                  | 595                                                                 | 273                                                                                                | 300                                                                                             | 53,526                                                                                              |
| 2044                  | 595                                                                 | 273                                                                                                | 299                                                                                             | 53,825                                                                                              |
| 2045                  | 595                                                                 | 273                                                                                                | 298                                                                                             | 54,123                                                                                              |
| 2046                  | 595                                                                 | 273                                                                                                | 299                                                                                             | 54,422                                                                                              |
| 2047                  | 595                                                                 | 273                                                                                                | 298                                                                                             | 54,720                                                                                              |
| 2048                  | 595                                                                 | 273                                                                                                | 298                                                                                             | 55,018                                                                                              |
| 2049                  | 595                                                                 | 273                                                                                                | 297                                                                                             | 55,315                                                                                              |
| 2050                  | 595                                                                 | 273                                                                                                | 297                                                                                             | 55,612                                                                                              |
| 2051                  | 595                                                                 | 273                                                                                                | 296                                                                                             | 55,908                                                                                              |
| 2052                  | 595                                                                 | 273                                                                                                | 295                                                                                             | 56,204                                                                                              |
| 2053                  | 595                                                                 | 273                                                                                                | 296                                                                                             | 56,499                                                                                              |
| 2054                  | 595                                                                 | 273                                                                                                | 295                                                                                             | 56,794                                                                                              |
| 2055                  | 595                                                                 | 273                                                                                                | 294                                                                                             | 57,088                                                                                              |
| 2056                  | 595                                                                 | 273                                                                                                | 294                                                                                             | 57,382                                                                                              |
| 2057                  | 595                                                                 | 273                                                                                                | 292                                                                                             | 57,675                                                                                              |
| 2058                  | 595                                                                 | 273                                                                                                | 293                                                                                             | 57,967                                                                                              |
| 2059                  | 595                                                                 | 273                                                                                                | 292                                                                                             | 58,259                                                                                              |
| 2060                  | 595                                                                 | 273                                                                                                | 291                                                                                             | 58,549                                                                                              |
| 2061                  | 595                                                                 | 273                                                                                                | 290                                                                                             | 58,839                                                                                              |

| <b>Inventory Year</b> | <b>Harvest<br/>(1x10<sup>3</sup> m<sup>3</sup> yr<sup>-1</sup>)</b> | <b>Committed<br/>100-year<br/>Emissions<br/>(1x10<sup>3</sup> tCO<sub>2</sub> yr<sup>-1</sup>)</b> | <b>Annual<br/>Realized<br/>Emissions<br/>(1x10<sup>3</sup> tCO<sub>2</sub> yr<sup>-1</sup>)</b> | <b>Cumulative<br/>Realized<br/>Emissions<br/>(1x10<sup>3</sup> tCO<sub>2</sub> yr<sup>-1</sup>)</b> |
|-----------------------|---------------------------------------------------------------------|----------------------------------------------------------------------------------------------------|-------------------------------------------------------------------------------------------------|-----------------------------------------------------------------------------------------------------|
| 2062                  | 595                                                                 | 273                                                                                                | 288                                                                                             | 59,127                                                                                              |
| 2063                  | 595                                                                 | 273                                                                                                | 288                                                                                             | 59,415                                                                                              |
| 2064                  | 595                                                                 | 273                                                                                                | 286                                                                                             | 59,701                                                                                              |
| 2065                  | 595                                                                 | 273                                                                                                | 285                                                                                             | 59,986                                                                                              |
| 2066                  | 595                                                                 | 273                                                                                                | 285                                                                                             | 60,271                                                                                              |
| 2067                  | 595                                                                 | 273                                                                                                | 284                                                                                             | 60,555                                                                                              |
| 2068                  | 595                                                                 | 273                                                                                                | 283                                                                                             | 60,838                                                                                              |
| 2069                  | 595                                                                 | 273                                                                                                | 282                                                                                             | 61,120                                                                                              |
| 2070                  | 595                                                                 | 273                                                                                                | 281                                                                                             | 61,401                                                                                              |
| 2071                  | 595                                                                 | 273                                                                                                | 280                                                                                             | 61,680                                                                                              |
| 2072                  | 595                                                                 | 273                                                                                                | 279                                                                                             | 61,959                                                                                              |
| 2073                  | 595                                                                 | 273                                                                                                | 278                                                                                             | 62,237                                                                                              |
| 2074                  | 595                                                                 | 273                                                                                                | 276                                                                                             | 62,513                                                                                              |
| 2075                  | 595                                                                 | 273                                                                                                | 276                                                                                             | 62,789                                                                                              |
| 2076                  | 595                                                                 | 273                                                                                                | 275                                                                                             | 63,064                                                                                              |
| 2077                  | 595                                                                 | 273                                                                                                | 274                                                                                             | 63,338                                                                                              |
| 2078                  | 595                                                                 | 273                                                                                                | 273                                                                                             | 63,611                                                                                              |
| 2079                  | 595                                                                 | 273                                                                                                | 274                                                                                             | 63,884                                                                                              |
| 2080                  | 595                                                                 | 273                                                                                                | 272                                                                                             | 64,157                                                                                              |
| 2081                  | 595                                                                 | 273                                                                                                | 272                                                                                             | 64,428                                                                                              |
| 2082                  | 595                                                                 | 273                                                                                                | 271                                                                                             | 64,700                                                                                              |
| 2083                  | 595                                                                 | 273                                                                                                | 271                                                                                             | 64,970                                                                                              |
| 2084                  | 595                                                                 | 273                                                                                                | 270                                                                                             | 65,241                                                                                              |
| 2085                  | 595                                                                 | 273                                                                                                | 271                                                                                             | 65,511                                                                                              |
| 2086                  | 595                                                                 | 273                                                                                                | 270                                                                                             | 65,781                                                                                              |
| 2087                  | 595                                                                 | 273                                                                                                | 270                                                                                             | 66,051                                                                                              |
| 2088                  | 595                                                                 | 273                                                                                                | 269                                                                                             | 66,320                                                                                              |
| 2089                  | 595                                                                 | 273                                                                                                | 269                                                                                             | 66,589                                                                                              |
| 2090                  | 595                                                                 | 273                                                                                                | 268                                                                                             | 66,857                                                                                              |
| 2091                  | 595                                                                 | 273                                                                                                | 268                                                                                             | 67,125                                                                                              |
| 2092                  | 595                                                                 | 273                                                                                                | 268                                                                                             | 67,393                                                                                              |
| 2093                  | 595                                                                 | 273                                                                                                | 267                                                                                             | 67,661                                                                                              |
| 2094                  | 595                                                                 | 273                                                                                                | 267                                                                                             | 67,928                                                                                              |
| 2095                  | 595                                                                 | 273                                                                                                | 267                                                                                             | 68,195                                                                                              |
| 2096                  | 595                                                                 | 273                                                                                                | 267                                                                                             | 68,462                                                                                              |
| 2097                  | 595                                                                 | 273                                                                                                | 267                                                                                             | 68,729                                                                                              |
| 2098                  | 595                                                                 | 273                                                                                                | 267                                                                                             | 68,996                                                                                              |
| 2099                  | 595                                                                 | 273                                                                                                | 267                                                                                             | 69,264                                                                                              |
| 2100                  | 595                                                                 | 273                                                                                                | 267                                                                                             | 69,531                                                                                              |
| <b>Total</b>          | <b>158,560</b>                                                      | <b>72,876</b>                                                                                      | <b>69,531</b>                                                                                   | <b>69,531</b>                                                                                       |
| <b>Average</b>        | <b>826</b>                                                          | <b>380</b>                                                                                         | <b>362</b>                                                                                      | <b>N/A</b>                                                                                          |

## References

1. Stockmann, K.; Anderson, N.; Young, J.; Skog, K.; Healey, S.; Loeffler, D. 2014. Estimates of carbon stored in harvested wood products from United States Forest Service Intermountain Region, 1911-2012. Unpublished report. Missoula, MT: USDA, Forest Service, Rocky Mountain Res. Sta., 28 pp. <https://www.fs.usda.gov/treearch/pubs/46646>
2. Loeffler, D.; Anderson, N.; Stockmann, K.; Skog, K.; Healey, S.; Jones, J.G.; Morrison, J.; Young, J. 2014. Estimates of carbon stored in harvested wood products from United States Forest Service Alaska Region, 1910-2012. Unpublished report. Missoula, MT: USDA, Forest Service, Rocky Mountain Res. Sta., 26 pp. <https://www.nrs.fs.fed.us/pubs/46643>
3. Buma, B.; Thompson, T. 2019. Long-term exposure to more frequent disturbances increases baseline carbon in some ecosystems: Mapping and quantifying the disturbance frequency-ecosystem C relationship. PLOS ONE 14:e0212526. doi:10.1371/journal.pone.0212526
4. Harris, N. L.; multiple authors. 2021. Global maps of twenty-first century forest carbon fluxes. Nature Climate Change. doi:10.1038/s41558-020-00976-6
5. McNicol, G.; multiple authors. 2019. Large, climate-sensitive soil carbon stocks mapped with pedology-informed machine learning in the North Pacific coastal temperate rainforest. Environmental Research Letters 14:014004. doi:10.1088/1748-9326/aaed52
